# Supplementary material for: Population genomics shed light on the demographic and adaptive histories of European invasion in the Pacific oyster, Crassostrea gigas
Source: PubMed Central journal article supplement (PMC3804239; doi:10.1111/eva.12086), 2013-07-24

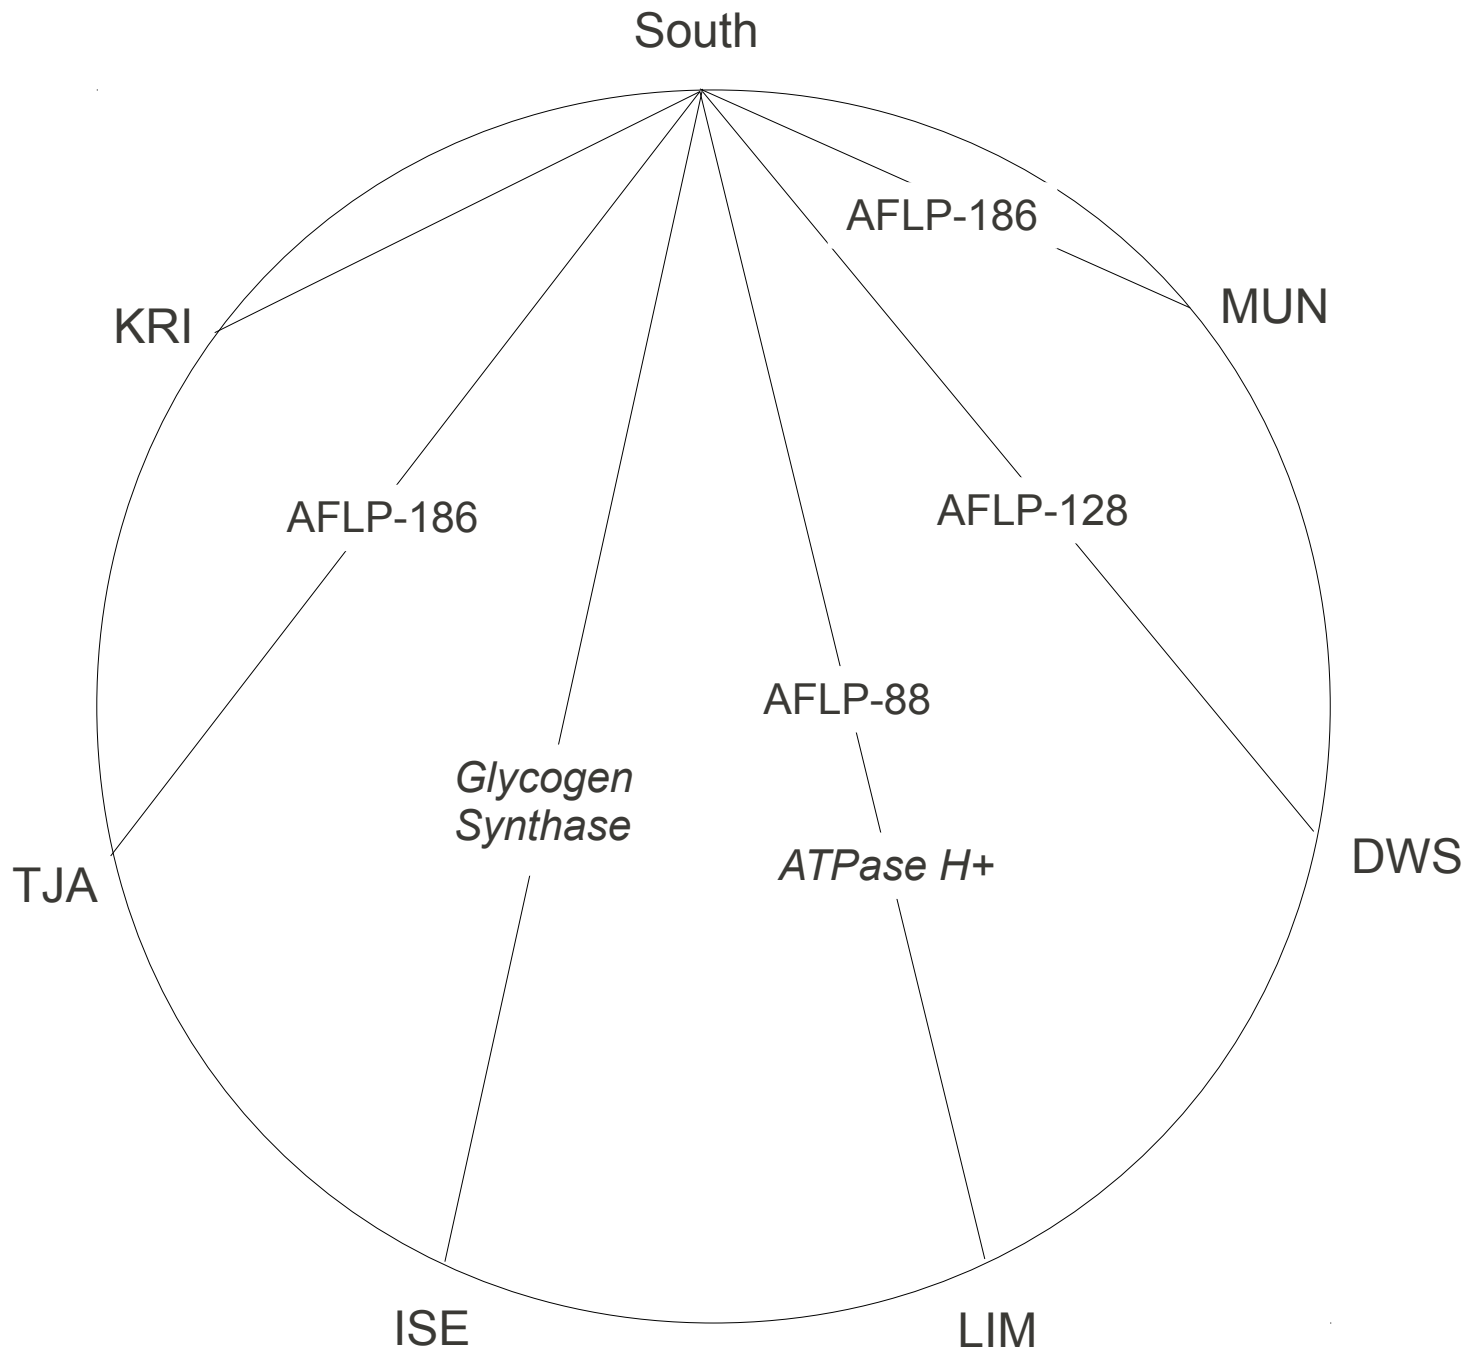

Supplement: eva0006-1064-SD2.pdf [file eva0006-1064-SD2.pdf]
